# Supplementary material
Source: PubMed Central journal article supplement (PMC5512065)
Supplement: 10.1074_M117.793521_jbc.M117.793521-1.pdf [file 10.1074_M117.793521_jbc.M117.793521-1.pdf]

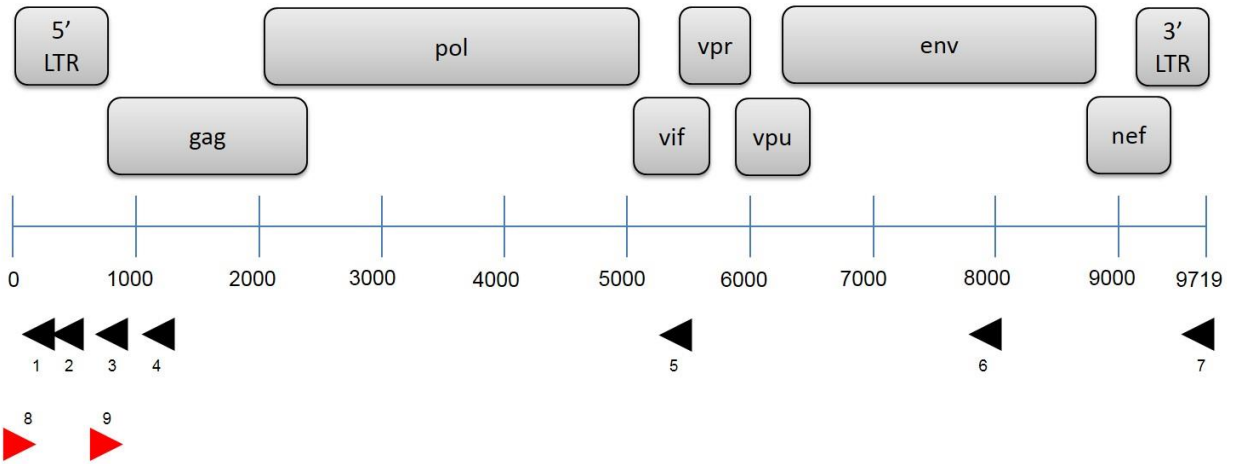

**Supplemental Figure 1: A diagram of the location of primers used in this study.** The arrows represent all HIV-1 primers used in this study. The black arrows represent the reverse primers. #1, 2, 4, 5, 6, and 7 were used in RT reactions. “TAR” and “TAR-gag” RT-qPCR used primers #1 and 8. “Genomic” RT-qPCR used primers #3 and 9.

| Primer/Probe name | Primer/Probe Sequence                       | Location in HIV-1 genome |
|-------------------|---------------------------------------------|--------------------------|
| 8: TARfil-F       | 5'- GGT CTC TCT GGT TAG ACC AGA TCT G -3'   | 1-25                     |
| 1: TAR+59R*       | 5'- CAA CAG ACG GGC ACA CAC TAC -3'         | 99-119                   |
| 2: LTR+341-R*     | 5'- ACC CAT CTC TCT CCT TCT AGC C -3'       | 320-341                  |
| 9: GAG1-F         | 5'- TCA GCC CAG AAG TAA TAC CCA TGT -3'     | 835-849                  |
| 3: GAG2-R         | 5'- CAC TGT GTT TAG CAT GGT GTT T -3'       | 886-909                  |
| 4: Gag 1625R*     | 5'- GCT GGT AGG GCT ATA CAT TCT TAC -3'     | 1155-1178                |
| 5: Vpr-R208*      | 5'- TAA ACG GCA GTT GTT GCA GA -3'          | 5293-5312                |
| 6: Env-2187R*     | 5'-TGG GAT AAG GGT CTG AAA CG-3'            | 7917-7936                |
| 7: 5T25*          | 5'- TTT TTT TTT TTT TTT TTT TTT TTG AAG -3' | 9178+                    |
| NF-κB1-2F         | 5'-TTC CGC TGG GGA CTT TCC -3'              |                          |
| EAP20-F           | 5'-TTC CTG GGC TAC TAC GAT GG-3'            |                          |
| EAP20-R           | 5'-ATG CTG GAC TGT TTG TGC AG-3'            |                          |
| CD63-F            | 5' CCC TTG GAA TTG CTT TTG TCG 3'           |                          |
| CD63-R            | 5' CGT AGC CAC TTC TGA TAC TCT TC-3'        |                          |

\*primers used  
in RT reaction

**Supplemental Figure 2: Primer sequences used in this study.** All primer names, sequences, and exact locations in the HIV-1 genome (when applicable) used throughout this study are shown. Numbers correspond to numbers in **Sup. Fig. 1**. Primers marked with “\*” were used in RT reactions.

| WIHS Patient Number | Group         | Race             | Age |
|---------------------|---------------|------------------|-----|
| 30306305            | ART Responder | White            | 34  |
| 30306608            | ART Responder | White            | 33  |
| 30409062            | ART Responder | African American | 45  |
| 30403086            | ART Responder | Hispanic         | 35  |

**Supplemental Figure 3: Patient demographics.** Patient samples used in **Fig. 8** were obtained from WIHS. Their patient number, group, race, and age are shown in the figure.

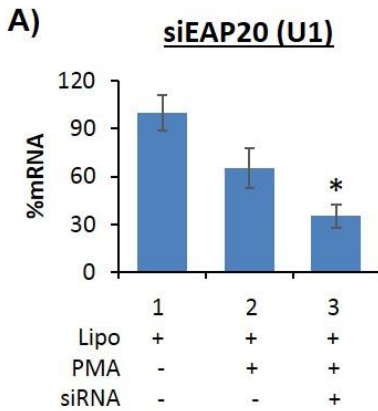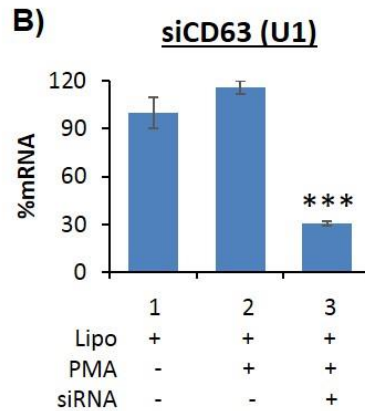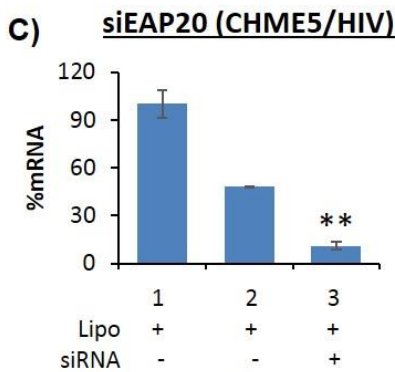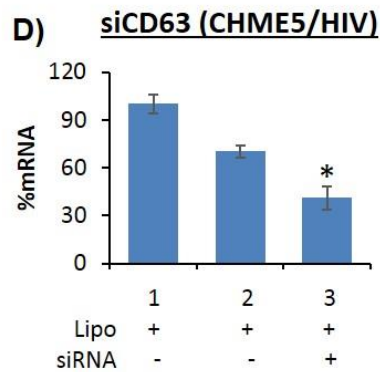

**Supplemental Figure 4: siRNA knockdown of ESCRT.** U1 cells were seeded then transfected with siRNA the next day. After one day, the supernatant was removed and replaced with fresh media with PMA. After 3 days the cells and supernatant were harvested. The cells were lysed and DNA and RNA were isolated. The RNA was subjected to RT with oligo-dT primers. RT-qPCR was performed with primers specific for EAP20 (**A**) and CD63 (**B**) (two of the targets of siRNA). The percent of the control (Lipo+, PMA-) was found. Student's T-test was performed between the Lipo+ PMA+ cells and the siRNA-treated cells. GAPDH RT-qPCR was performed on the DNA for normalization. CHME5/HIV cells were seeded and transfected with siRNA the next day. After one day, the supernatant was removed and replaced with exosome-free DMEM. After 3 days the cells and supernatant were harvested. The cells were lysed and DNA and RNA were isolated. The RNA was subjected to RT with Oligo-dT primers, and RT-qPCR was performed with primers specific for the EAP20 (**C**) and CD63 (**D**) (two of the targets of siRNA). Percentage of the negative control (Lipo-) were found. Student's T-test was performed between the Lipo+ cells and the siRNA-treated cells. GAPDH RT-qPCR was performed on the DNA for normalization.

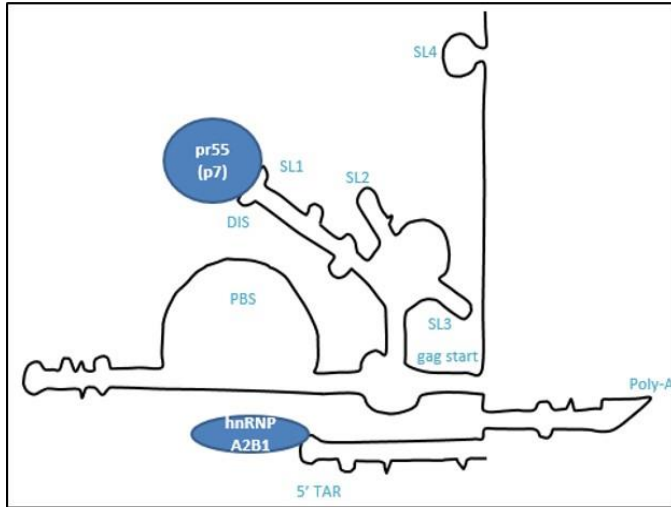

**Supplemental Figure 5: Diagram of TAR-gag and its binding partners.** The hnRNPA2B1 binds to the TAR region (either methylated or unmethylated) and pr55 Gag (through p7) binds to the DIS/SL1 region of HIV-1 RNA. The complex is potentially packaged into exosomes released from infected cells.
